# Supplementary material for: Candidate Acetic Acid Bacteria Strains for Levan Production
Source: MDPI journal article supplement (doi:10.3390/polym14102000), 2022-05-13
Supplement: s1 [file s1]

## Supplementary files

**Table S1** Effect of sucrose concentration based on Pearson correlation index.  $R^2$  values  $\geq 0.6$  were considered as positive correlation, while  $R^2 \leq -0.6$  was considered as a negative correlation.

| Species                                           | Pearson index | P-value |
|---------------------------------------------------|---------------|---------|
| <i>N. chiangmaiensis</i> NBRC 101099 <sup>T</sup> | 0.65          | 0.0035  |
| <i>Ko. baliensis</i> DSM 14400 <sup>T</sup>       | 0.63          | 0.0050  |
| <i>G. cerinus</i> DSM 9533 <sup>T</sup>           | -0.67         | 0.0023  |
| <i>G. frateurii</i> DSM 7146 <sup>T</sup>         | -0.55         | 0.0184  |
| <i>G. oxydans</i> DSM 2343                        | -0.55         | 0.0172  |
| <i>K. xylinus</i> DSM 2004                        | 0.54          | 0.0214  |
| <i>K. xylinus</i> DSM 6513 <sup>T</sup>           | 0.33          | 0.1867  |
| <i>K. xylinus</i> K2G30=UMCC 2756                 | 0.13          | 0.5949  |
| <i>K. hansenii</i> DSM 5602 <sup>T</sup>          | -0.46         | 0.0566  |
| <i>K. hansenii</i> ATCC 53582                     | 0.08          | 0.764   |
| <i>A. pasteurianus</i> DSM 3509 <sup>T</sup>      | 0.34          | 0.1617  |
| <i>A. pasteurianus</i> AB0220=UMCC 1754           | 0.48          | 0.0439  |

**Table S2** Titratable acidity at low and high sucrose concentration at 48 and 96 h of incubation.

| Species                                           | 70 g/L      |             | 250 g/L     |             |
|---------------------------------------------------|-------------|-------------|-------------|-------------|
|                                                   | 48 h        | 96 h        | 48 h        | 96 h        |
| <i>N. chiangmaiensis</i> NBRC 101099 <sup>T</sup> | 0.63 ± 0.14 | 0.64 ± 0.01 | 0.86 ± 0.03 | 1.39 ± 0.06 |
| <i>Ko. baliensis</i> DSM 14400 <sup>T</sup>       | 0.87 ± 0.06 | 1.13 ± 0.02 | 0.48 ± 0.03 | 2.58 ± 0.14 |
| <i>G. cerinus</i> DSM 9533 <sup>T</sup>           | 0.78 ± 0.03 | 0.92 ± 0.04 | 0.07 ± 0.01 | 0.11 ± 0.01 |
| <i>G. frateurii</i> DSM 7146 <sup>T</sup>         | 0.8 ± 0.08  | 0.91 ± 0.08 | 0.08 ± 0.01 | 0.09 ± 0.01 |
| <i>G. oxydans</i> DSM 2343                        | 0.41 ± 0.06 | 0.45 ± 0.06 | 0.08 ± 0    | 0.09 ± 0.01 |
| <i>K. xylinus</i> DSM 2004                        | 0.48 ± 0.03 | 0.39 ± 0.05 | 0.25 ± 0.03 | 0.31 ± 0.02 |
| <i>K. xylinus</i> DSM 6513 <sup>T</sup>           | 0.35 ± 0.07 | 0.36 ± 0.07 | 0 ± 0       | 0.03 ± 0.01 |
| <i>K. xylinus</i> K2G30=UMCC 2756                 | 0.6 ± 0.17  | 0.61 ± 0.04 | 0.39 ± 0.03 | 0.21 ± 0.21 |
| <i>K. hansenii</i> DSM 5602 <sup>T</sup>          | 0.32 ± 0.03 | 0.36 ± 0.03 | 0.08 ± 0.01 | 0.1 ± 0.01  |
| <i>K. hansenii</i> ATCC 53582                     | 0.3 ± 0.02  | 0.4 ± 0.06  | 0.18 ± 0.16 | 0.09 ± 0.01 |
| <i>A. pasteurianus</i> DSM 3509 <sup>T</sup>      | 0.31 ± 0.06 | 0.27 ± 0.05 | 0.02 ± 0.02 | 0.05 ± 0.01 |
| <i>A. pasteurianus</i> AB0220=UMCC 1754           | 0.45 ± 0.02 | 0.46 ± 0.23 | 0.16 ± 0.1  | 1.21 ± 0.57 |

\*Values are mentioned as mean ± standard deviation.
